# Supplementary material for: Considering Self-Care in High School Home Economics Education with the Aid of Scoping Reviews of Mindfulness and Cooking and of Mindfulness and Knitting
Source: MDPI journal article supplement (doi:10.3390/youth3040083), 2023-11-27
Supplement: s1 [file s1]

Archive with 2 entries (2 files):
- youth-2623531-supplementary-File S1.pdf
- youth-2623531-supplementary-Tables.pdf
