# Supplementary material for: Considering Self-Care in High School Home Economics Education with the Aid of Scoping Reviews of Mindfulness and Cooking and of Mindfulness and Knitting
Source: MDPI journal article supplement (doi:10.3390/youth3040083), 2023-11-27
Supplement: s1 [file s1]

## Supplementary Document

**Table S1.** Critical Appraisal of the Retrieved Papers. (Mindfulness and Cooking)

| Authors                                                 |                                     | Study Design                          | JBI Critical Appraisal for Qualitative Research |    |    |    |    |    |    |    |    |     |     |     |     | Overall Appraisal |
|---------------------------------------------------------|-------------------------------------|---------------------------------------|-------------------------------------------------|----|----|----|----|----|----|----|----|-----|-----|-----|-----|-------------------|
|                                                         |                                     |                                       | Q1                                              | Q2 | Q3 | Q4 | Q5 | Q6 | Q7 | Q8 | Q9 | Q10 | /   | /   | /   |                   |
| 1                                                       | Méndez et al. (2020))               | R.Qualitative Interview               | -N                                              | Y  | Y  | Y  | Y  | Y  | N  | Y  | Y  | Y   | /   | /   | /   | Include           |
| 2                                                       | Pierce et al. (2017)                | Qualitative Interview                 | -N                                              | Y  | Y  | Y  | Y  | Y  | N  | Y  | Y  | Y   | /   | /   | /   | Include           |
| 3                                                       | Thompson et al. (2021)              | Qualitative Interview                 | -N                                              | Y  | Y  | Y  | Y  | Y  | N  | Y  | Y  | Y   | /   | /   | /   | Include           |
| JBI Critical Appraisal for Text and Opinion Papers      |                                     |                                       |                                                 |    |    |    |    |    |    |    |    |     |     |     |     |                   |
|                                                         |                                     |                                       | Q1                                              | Q2 | Q3 | Q4 | Q5 | Q6 | /  | /  | /  | /   | /   | /   | /   |                   |
| 4                                                       | Burton & W.A. (2020)                | E.T.Qualitative Intervention Protocol | -Y                                              | Y  | Y  | Y  | Y  | Y  | /  | /  | /  | /   | /   | /   | /   | Include           |
| 5                                                       | de Queiroz F.L.N et al. (2012)      | Qualitative Literature Review         | -Y                                              | Y  | Y  | Y  | Y  | Y  | /  | /  | /  | /   | /   | /   | /   | Include           |
| 6                                                       | Dijker A.J.M. (2019)                | Qualitative-Literature Review         | Y                                               | Y  | Y  | Y  | Y  | Y  | /  | /  | /  | /   | /   | /   | /   | Include           |
| 7                                                       | Eisenberg D.M. Imamura B.D.A (2019) | Qualitative & Literature Review       | -Y                                              | Y  | Y  | Y  | Y  | Y  | /  | /  | /  | /   | /   | /   | /   | Include           |
| JBI Critical Appraisal for Randomized Controlled Trials |                                     |                                       |                                                 |    |    |    |    |    |    |    |    |     |     |     |     |                   |
|                                                         |                                     |                                       | Q1                                              | Q2 | Q3 | Q4 | Q5 | Q6 | Q7 | Q8 | Q9 | Q10 | Q11 | Q12 | Q13 |                   |
| 8                                                       | Janssen L.K. et al. (2018)          | Quantitative                          | Y                                               | UC | Y  | Y  | UC | UC | Y  | Y  | Y  | Y   | Y   | Y   | NA  | Include           |
| 9                                                       | Unick J.L. et al. (2022)            | Quantitative                          | Y                                               | UC | Y  | Y  | UC | UC | Y  | Y  | Y  | Y   | Y   | Y   | NA  | Include           |
| JBI Critical Appraisal for Quasi-experimental studies   |                                     |                                       |                                                 |    |    |    |    |    |    |    |    |     |     |     |     |                   |
|                                                         |                                     |                                       | Q1                                              | Q2 | Q3 | Q4 | Q5 | Q6 | Q7 | Q8 | Q9 | /   | /   | /   | /   |                   |
| 10                                                      | Eisenberg D.M. et al. (2019)        | Quantitative                          | Y                                               | UC | UC | N  | Y  | Y  | Y  | Y  | Y  | /   | /   | /   | /   | Include           |
| 11                                                      | Gardiner et al. (2022)              | Quantitative                          | Y                                               | UC | UC | N  | Y  | Y  | Y  | Y  | Y  | /   | /   | /   | /   | Include           |
| 12                                                      | Kakareka et al.(2019)               | Quantitative                          | Y                                               | Y  | UC | Y  | Y  | Y  | Y  | Y  | Y  | /   | /   | /   | /   | Include           |

Note. Y = Yes; N = No; UC = Unclear; NA = Not Applicable.

**Table 2.** Critical Appraisal of the Retrieved Papers. (Mindfulness and Knitting)

| Authors                                                |                      |                               | Study Design |    | JBIC Critical Appraisal for Text and Opinion Papers |    |    |    |    |    |    |   |   |   |   |                   |  |  |
|--------------------------------------------------------|----------------------|-------------------------------|--------------|----|-----------------------------------------------------|----|----|----|----|----|----|---|---|---|---|-------------------|--|--|
|                                                        |                      |                               | Q1           | Q2 | Q3                                                  | Q4 | Q5 | Q6 | /  | /  | /  | / | / | / | / | Overall Appraisal |  |  |
| 1                                                      | Graham & Lewis, 2023 | Qualitative Literature Review | −Y           | Y  | Y                                                   | Y  | Y  | Y  | /  | /  | /  | / | / | / | / | Include           |  |  |
| 2                                                      | Hofsess, 2021        | Qualitative Literature Review | −Y           | Y  | Y                                                   | Y  | Y  | Y  | /  | /  | /  | / | / | / | / | Include           |  |  |
| JBIC Critical Appraisal for Cross-sectional Study      |                      |                               |              |    |                                                     |    |    |    |    |    |    |   |   |   |   |                   |  |  |
|                                                        |                      |                               | Q1           | Q2 | Q3                                                  | Q4 | Q5 | Q6 | Q7 | Q8 |    |   |   |   |   |                   |  |  |
| 3                                                      | Riley et al., 2013   | Quantitative                  | UC           | Y  | Y                                                   | Y  | UC | UC | Y  | Y  | /  | / | / | / | / | Include           |  |  |
| 4                                                      | Kaimal et al., 2017  | Quantitative                  | NA           | Y  | Y                                                   | Y  | UC | UC | Y  | Y  | /  | / | / | / | / | Include           |  |  |
| JBIC Critical Appraisal for Quasi-experimental studies |                      |                               |              |    |                                                     |    |    |    |    |    |    |   |   |   |   |                   |  |  |
|                                                        |                      |                               | Q1           | Q2 | Q3                                                  | Q4 | Q5 | Q6 | Q7 | Q8 | Q9 | / | / | / | / |                   |  |  |
| 5                                                      | Coholic et al., 2011 | Quantitative                  | Y            | Y  | Y                                                   | Y  | Y  | Y  | Y  | Y  | Y  |   |   |   |   | Include           |  |  |

Note. Y = Yes; N = No; UC = Unclear; NA = Not Applicable.
